# Supplementary material for: Towards determining molecular structure with ESI-MS backed by computational methods: structures of subnanoclusters of Pd and Cu chlorides, ion dynamics in vacuum, and challenges to the methodology
Source: Royal Society of Chemistry journal article supplement (doi:10.1039/d2qi01098d), 2022-01-01
Supplement: d2qi01098d2.xlsx [file d2qi01098d2.xlsx]

## Sheet: CuCl_neg_MSARIS
All ions determined with MSARIS
Max peak	Molecular weight	Brutto	Formal	Relative, %	Relative, se*	Cosine	Cosine, se*	Error, ppm	Error, ppm se*
134.865	134.45	Cl2Cu1	Cu1Cl2	86.7198	3.6802	0.181873	0.00594232	8.50319	0.0289575
232.764	233.45	Cl3Cu2	Cu2Cl3	100	0	0.173421	0.00910917	3.34451	0.0289577
332.66	332.45	Cl4Cu3	Cu3Cl4	14.1891	0.510418	0.137735	0.00961174	6.38706	0.028958
430.558	431.45	Cl5Cu4	Cu4Cl5	2.4572	0.134985	0.108741	0.0075944	11.1308	0.0289582
530.454	530.45	Cl6Cu5	Cu5Cl6	2.44292	0.154179	0.123377	0.00878711	17.4068	0.0289584
						* standard error over the series of 3 ESI-MS spectra
Peak assignement: human vs MSARIS
Molecular weight	Intensity	Manual	MSARIS	Cosine
134.45	86.7198	CuCl2	CuCl2	0.181876
233.45	100	Cu2Cl3	Cu2Cl3	0.173451
332.45	14.1891	Cu3Cl4	Cu3Cl4	0.137819
431.45	2.4572	Cu4Cl5	Cu4Cl5	0.108743
530.45	2.44292	Cu5Cl6	Cu5Cl6	0.123376

## Sheet: CuCl_pos_MSARIS
All ions determined with MSARIS
Max peak	Molecular weight	Brutto	Formal	Relative, %	Relative, se*	Cosine	Cosine, se*	Error, ppm	Error, ppm se*
103.956	104.6	C2Cu1H3N1	Cu1(CH3CN)1	65.2041	0.0200705	0.0390429	0.00169829	2.09856	0.00711925
121.967	122.61	C2Cu1H5N1O1	Cu1(CH3CN)1(H2O)1	35.1216	0.557308	0.0297336	0.00443218	13.6069	2.17044
131.962	132.61	C2Cu1H3N3	Cu1(CH3CN)1(N2)1	100	0	0.0661698	0.000781607	0.0526806	0.00711924
144.983	145.65	C4Cu1H6N2	Cu1(CH3CN)2	71.6666	1.42502	0.0614693	0.00649352	7.5882	0.00711919
203.852	203.6	C2Cl1Cu2H3N1	Cu2Cl1(CH3CN)1	4.20972	0.0882152	0.0311215	0.00592104	14.3558	0.00711915
231.859	231.61	C2Cl1Cu2H3N3	Cu2Cl1(CH3CN)1(N2)1	8.37705	0.359132	0.0297644	0.00534343	1.63721	0.00711925
244.879	244.65	C4Cl1Cu2H6N2	Cu2Cl1(CH3CN)2	18.5608	0.0953133	0.0380664	0.00528098	0.440289	0.00711926
301.751	302.6	C2Cl2Cu3H3N1	Cu3Cl2(CH3CN)1	1.71835	0.0291646	0.0178227	0.00255198	6.84269	0.00711921
319.761	320.61	C2Cl2Cu3H5N1O1	Cu3Cl2(CH3CN)1(H2O)1	6.67854	0.204134	0.355336	0.00331804	10.8372	0.00711919
329.757	330.61	C2Cl2Cu3H3N3	Cu3Cl2(CH3CN)1(N2)1	6.67854	0.204134	0.0251359	0.00572534	9.25167	0.0071192
342.777	343.65	C4Cl2Cu3H6N2	Cu3Cl2(CH3CN)2	6.73707	0.309569	0.0250991	0.00570996	10.2032	0.00711919
						* standard error over the series of 3 ESI-MS spectra
Peak assignement: human vs MSARIS
Molecular weight	Intensity	Manual	MSARIS	Cosine
104.6	65.2041	Cu(CH3CN)	Cu(CH3CN)	0.0390429
122.61	35.1216	Cu(CH3CN)(H2O)	Cu(CH3CN)(H2O)	0.0297336
132.61	100	Cu(CH3CN)N2	Cu(CH3CN)N2	0.0661698
145.65	71.6666	Cu(CH3CN)2	Cu(CH3CN)2	0.0614693
203.6	4.20972	Cu2Cl(CH3CN)	Cu2Cl(CH3CN)	0.0311215
221.61	6.01892	Cu2Cl(CH3CN)(H2O)
231.61	8.37705	Cu2Cl(CH3CN)N2	Cu2Cl(CH3CN)N2	0.0297644
244.65	18.5608	Cu2Cl(CH3CN)2	Cu2Cl(CH3CN)2	0.0380664
302.6	1.71835	Cu3Cl2(CH3CN)	Cu3Cl2(CH3CN)	0.0178227
320.61	6.67854	Cu3Cl2(CH3CN)(H2O)	Cu3Cl2(CH3CN)(H2O)	0.355336
330.61	6.67854	Cu3Cl2(CH3CN)N2	Cu3Cl2(CH3CN)N2	0.0251359
343.65	6.73707	Cu3Cl2(CH3CN)2	Cu3Cl2(CH3CN)2	0.0250991

## Sheet: PdCl2+CuCl_neg_MSARIS
All ions determined with MSARIS
Max peak	Molecular weight	Brutto	Formal	Relative, %	Relative, se*	Cosine	Cosine, se*	Error, ppm	Error, ppm se*
134.865	134.45	Cl2Cu1	Cu1Cl2	78.8514	5.97351	0.0502307	0.00318624	13.2971	0.0406364
177.84	177.32	Cl2Pd1	Pd1Cl2	28.6814	0.553868	0.0451877	0.00630728	4.11318	0.0406369
212.808	212.77	Cl3Pd1	Pd1Cl3	89.3025	3.711	0.090285	0.00832876	4.5737	0.0406364
232.764	233.45	Cl3Cu2	Cu2Cl3	100	0	0.104052	0.00992402	4.00822	0.0406368
312.706	311.77	Cl4Cu1Pd1	Cu1Pd1Cl4	5.5889	0.047328	0.0315078	0.00611167	3.73183	0.0406366
332.66	332.45	Cl4Cu3	Cu3Cl4	4.75811	0.097052	0.0397774	0.00694517	4.48598	0.0406366
390.649	390.09	Cl5Pd2	Pd2Cl5	9.48505	0.525731	0.044452	0.00702309	6.77137	0.0406367
410.603	410.77	Cl5Cu2Pd1	Cu2Pd1Cl5	8.59568	0.217892	0.044038	0.00780404	2.17022	0.0406365
488.547	489.09	Cl6Cu1Pd2	Cu1Pd2Cl6	24.87	0.261227	0.0857523	0.0124506	3.21834	0.0406365
510.5	509.77	Cl6Cu3Pd1	Cu3Pd1Cl6	2.28413	0.054634	0.0370544	0.00600546	6.36458	0.381893
566.49	567.42	Cl7Pd3	Pd3Cl7	4.08748	0.0559234	0.227115	0.0163065	2.82024	0.0406364
588.443	588.09	Cl7Cu2Pd2	Cu2Pd2Cl7	5.01903	0.0870651	0.0515138	0.0071946	0.324401	0.0406363
608.398	608.77	Cl7Cu4Pd1	Cu4Pd1Cl7	1.41944	0.0515454	0.0396429	0.00522064	3.13888	0.0406362
666.386	666.41	Cl8Cu1Pd3	Cu1Pd3Cl8	4.0502	0.169128	0.0769624	0.00797735	6.83796	2.86634
688.339	687.09	Cl8Cu3Pd2	Cu3Pd2Cl8	2.08703	0.0338621	0.0801787	0.0027516	1.13433	0.0406362
720.329	719.09	Cl8Cu3O2Pd2	Cu3Pd2Cl8(O2)1	1.31962	0.0536272	0.102459	0.00402409	1.08609	0.0406363
766.284	765.41	Cl9Cu2Pd3	Cu2Pd3Cl9	2.93628	0.115657	0.0475516	0.00542512	4.09271	1.78676
Peak assignement: human vs MSARIS						* standard error over the series of 3 ESI-MS spectra
Molecular weight	Intensity	Manual	MSARIS	Cosine
134.45	78.8514	CuCl2	CuCl2	0.0502307
177.32	28.6814	PdCl2	PdCl2	0.0451877
212.77	89.3025	PdCl3	PdCl3	0.090285
233.45	100	Cu2Cl3	Cu2Cl3	0.104052
311.77	5.5889	CuPdCl4	CuPdCl4	0.0315078
332.45	4.75811	Cu3Cl4	Cu3Cl4	0.0397774
390.09	9.48505	Pd2Cl5	Pd2Cl5	0.044452
410.77	8.59568	Cu2PdCl5	Cu2PdCl5	0.044038
489.09	24.87	CuPd2Cl6	CuPd2Cl6	0.0857523
509.77	2.28413	Cu3PdCl6	Cu3PdCl6	0.0370544
567.42	4.08748	Pd3Cl7	Pd3Cl7	0.227115
588.09	5.01903	Cu2Pd2Cl7	Cu2Pd2Cl7	0.0515138
608.77	1.41944	Cu4PdCl7	Cu4PdCl7	0.0396429
666.41	4.0502	CuPd3Cl8	CuPd3Cl8	0.0769624
687.09	2.08703	Cu3Pd2Cl8	Cu3Pd2Cl8	0.0801787
719.09	1.31962	Cu3Pd2Cl8O2	Cu3Pd2Cl8O2	0.102459
765.41	2.93628	Cu2Pd3Cl9	Cu2Pd3Cl9	0.0475516

## Sheet: PdCl2+CuCl_pos_MSARIS
All ions determined with MSARIS
Max peak	Molecular weight	Brutto	Formal	Relative, %	Relative, se*	Cosine	Cosine, se*	Error, ppm	Error, ppm se*
103.956	104.6	C2Cu1H3N1	Cu1(CH3CN)1	40.4149	2.11972	0.0270493	0.0012569	1.83767	0.00850743
121.967	122.61	C2Cu1H5N1O1	Cu1(CH3CN)1(H2O)1	25.1392	2.71624	0.0172107	0.00104369	9.01919	0.00850749
131.962	132.61	C2Cu1H3N3	Cu1(CH3CN)1(N2)1	64.7817	2.82231	0.057301	0.00141054	0.313576	0.00850742
144.983	145.65	C4Cu1H6N2	Cu1(CH3CN)2	100	0	0.0485282	0.000335796	7.8491	0.00850736
187.957	188.52	C4H6N2Pd1	Pd1(CH3CN)2	1.92063	0.0725535	0.00764402	0.00289865	2.57122	0.00850741
203.852	203.6	C2Cl1Cu2H3N1	Cu2Cl1(CH3CN)1	1.25044	0.0526349	0.00661161	0.00293629	4.77075	0.00850748
224.925	223.97	C4Cl1H6N2Pd1	Pd1Cl1(CH3CN)2	1.46768	0	0.00887745	0	10.8913	0
231.859	231.61	C2Cl1Cu2H3N3	Cu2Cl1(CH3CN)1(N2)1	2.37724	0.0997829	0.00627908	0.00154247	1.89811	0.00850742
244.879	244.65	C4Cl1Cu2H6N2	Cu2Cl1(CH3CN)2	8.49386	0.504164	0.013098	0.00151333	0.179393	0.00850744
281.796	281.92	C2Cl2Cu1H3N1Pd1	Cu1Pd1Cl2(CH3CN)1	2.6071	0.185174	0.00526069	0.000816429	8.19736	0.00850737
322.822	322.97	C4Cl2Cu1H6N2Pd1	Cu1Pd1Cl2(CH3CN)2	9.47621	0.661243	0.0159949	0.00316965	5.45209	0.00850749
381.693	380.92	C2Cl3Cu2H3N1Pd1	Cu2Pd1Cl3(CH3CN)1	2.5429	0.281077	0.00467209	0.000677461	0.917871	0.00850744
422.72	421.97	C4Cl3Cu2H6N2Pd1	Cu2Pd1Cl3(CH3CN)2	2.04432	0.253589	0.00480897	0.000541922	2.60614	0.00850747
500.663	500.29	C4Cl4Cu1H6N2Pd2	Cu1Pd2Cl4(CH3CN)2	2.58557	0.31424	0.00516336	0.000636715	0.457647	0.00850745
600.56	599.29	C4Cl5Cu2H6N2Pd2	Cu2Pd2Cl5(CH3CN)2	1.44113	0.248345	0.007614	6.76652e-05	4.61688	0.000774737
Peak assignement: human vs MSARIS						* standard error over the series of 3 ESI-MS spectra
Molecular weight	Intensity	Manual	MSARIS	Cosine
104.6	40.4149	Cu(CH3CN)	Cu(CH3CN)	0.0270493
122.61	25.1392	Cu(CH3CN)(H2O)	Cu(CH3CN)(H2O)	0.0172107
132.61	64.7817	Cu(CH3CN)N2	Cu(CH3CN)N2	0.057301
145.65	100	Cu(CH3CN)2	Cu(CH3CN)2	0.0485282
188.52	1.92063	Pd(CH3CN)2	Pd(CH3CN)2	0.00764402
203.6	1.25044	Cu2Cl(CH3CN)	Cu2Cl(CH3CN)	0.00661161
221.61	1.37006	Cu2Cl(CH3CN)(H2O)
223.97	1.46768	PdCl(CH3CN)2	PdCl(CH3CN)2	0.00887745
231.61	2.37724	Cu2Cl(CH3CN)N2	Cu2Cl(CH3CN)N2	0.00627908
244.65	8.49386	Cu2Cl(CH3CN)2	Cu2Cl(CH3CN)2	0.013098
281.92	2.6071	CuPdCl2(CH3CN)	CuPdCl2(CH3CN)	0.00526069
322.97	9.47621	CuPdCl2(CH3CN)2	CuPdCl2(CH3CN)2	0.0159949
380.92	2.5429	Cu2PdCl3(CH3CN)	Cu2PdCl3(CH3CN)	0.00467209
421.97	2.04432	Cu2PdCl3(CH3CN)2	Cu2PdCl3(CH3CN)2	0.00480897
500.29	2.58557	CuPd2Cl4(CH3CN)2	CuPd2Cl4(CH3CN)2	0.00516336
599.29	1.44113	Cu2Pd2Cl5(CH3CN)2	Cu2Pd2Cl5(CH3CN)2	0.007614

## Sheet: PdCl2_neg_MSARIS
All ions determined with MSARIS
Mass peak	Molecular weight	Brutto	Formal	Relative, %	Relative, se*	Cosine	Cosine, se*	Error, ppm	Error, ppm se*
134.865	134.45	Cl2Cu1	Cu1Cl2	24.291	4.0972	0.0480833	0.014058	11.9152	6.84647
177.84	177.32	Cl2Pd1	Pd1Cl2	24.894	1.41722	0.0417743	0.015502	1.29032	0.0995728
212.808	212.77	Cl3Pd1	Pd1Cl3	100	0	0.0829218	0.0242409	9.1872	0.0995724
232.764	233.45	Cl3Cu2	Cu2Cl3	7.65954	0.68326	0.0844629	0.0224261	0.0908894	0.000880187
312.706	311.77	Cl4Cu1Pd1	Cu1Pd1Cl4	1.86673	0.562732	0.0755421	0.00252874	13.9592	0.0908885
390.649	390.09	Cl5Pd2	Pd2Cl5	63.1365	4.38352	0.0852762	0.0215408	7.59886	0.0995734
488.547	489.09	Cl6Cu1Pd2	Cu1Pd2Cl6	1.40202	0	0.0689281	0	7.74781	0
566.49	567.42	Cl7Pd3	Pd3Cl7	45.9988	2.98806	0.0788285	0.0194009	6.3384	0.0995739
607.516	608.47	C2Cl7H3N1Pd3	Pd3Cl7(CH3CN)1	2.9888	0.294736	0.0378215	0.00573431	8.40057	0.0995737
744.33	744.74	Cl9Pd4	Pd4Cl9	8.53796	1.27286	0.0349152	0.00496437	0.75059	0.0995746
896.171	896.41	Cl10Cu3O2Pd3	Cu3Pd3Cl10(O2)1	2.4182	0.44623	0.260195	0.00897492	5.3409	0.0995743
922.171	922.06	Cl11Pd5	Pd5Cl11	2.12878	0.433415	0.0371444	0.00213588	5.63316	2.09519
Peak assignement: human vs MSARIS						* standard error over the series of 3 ESI-MS spectra
Molecular weight	Intensity	Manual	MSARIS	Cosine
134.45	24.291	CuCl2	CuCl2	0.0480833
177.32	24.894	PdCl2	PdCl2	0.0417743
212.77	100	PdCl3	PdCl3	0.0829218
233.45	7.65954	Cu2Cl3	Cu2Cl3	0.0844629
311.77	1.86673		Cl4CuPd	0.0755421
390.09	63.1365	Pd2Cl5	Pd2Cl5	0.0852762
489.09	1.40202	CuPd2Cl6	CuPd2Cl6	0.0689281
567.42	45.9988	Pd3Cl7	Pd3Cl7	0.0788285
608.47	2.9888	Pd3Cl7(CH3CN)	Pd3Cl7(CH3CN)	0.0378215
744.74	8.53796	Pd4Cl9	Pd4Cl9	0.0349152
896.41	2.4182	Cu3Pd3Cl10O2	Cu3Pd3Cl10O2	0.260195
922.06	2.12878	Pd5Cl11	Pd5Cl11	0.0371444

## Sheet: PdCl2_pos_MSARIS
All ions determined with MSARIS
Mass peak	Molecular weight	Brutto	Formal	Relative, %	Relative, se*	Cosine	Cosine, se*	Error, ppm	Error, ppm se*
146.93	147.47	C2H3N1Pd1	Pd1(CH3CN)1	3.44393	0.107489	0.10025	0.00586839	16.3493	0.0123485
187.957	188.52	C4H6N2Pd1	Pd1(CH3CN)2	8.15621	0.429406	0.0695468	0.00431001	2.3227	0.0123486
224.925	223.97	C4Cl1H6N2Pd1	Pd1Cl1(CH3CN)2	17.0195	0.899268	0.0629691	0.00471205	10.6505	0.0123486
400.766	401.29	C4Cl3H6N2Pd2	Pd2Cl3(CH3CN)2	29.2846	4.9622	0.0816938	0.0105171	8.38491	2.9761
428.772	429.31	C4Cl3H6N4Pd2	Pd2Cl3(CH3CN)2(N2)1	16.4349	2.72818	0.290547	0.0130906	4.64257	0.0123486
441.792	442.35	C6Cl3H9N3Pd2	Pd2Cl3(CH3CN)3	16.9403	3.1514	0.121464	0.00962722	8.67128	4.20651
578.606	578.61	C4Cl5H6N2Pd3	Pd3Cl5(CH3CN)2	3.30234	0.468232	0.0399151	0.00675402	13.5914	0.0123485
619.633	619.67	C6Cl5H9N3Pd3	Pd3Cl5(CH3CN)3	1.41373	0	0.0745584	0	14.0786	0
756.446	755.93	C4Cl7H6N2Pd4	Pd4Cl7(CH3CN)2	1.21872	0	0.0654066	0	13.0013	0
Peak assignement: human vs MSARIS						* standard error over the series of 3 ESI-MS spectra
Molecular weight	Intensity	Manual	MSARIS	Cosine
147.47	3.44393	Pd(CH3CN)	Pd(CH3CN)	0.10025
188.52	8.15621	Pd(CH3CN)2	Pd(CH3CN)2	0.0695468
223.97	17.0195	PdCl(CH3CN)2	PdCl(CH3CN)2	0.0629691
401.29	29.2846	Pd2Cl3(CH3CN)2	Pd2Cl3(CH3CN)2	0.0816938
419.266	5.38	Pd2Cl2(CH3CN)2(H2O)
429.31	16.4349		Pd2Cl3(CH3CN)2(N2)	0.290547
442.35	16.9403	Pd2Cl3(CH3CN)3	Pd2Cl3(CH3CN)3	0.121464
578.61	3.30234	Pd3Cl5(CH3CN)2	Pd3Cl5(CH3CN)2	0.0399151
619.67	1.41373	Pd3Cl5(CH3CN)3	Pd3Cl5(CH3CN)3	0.0745584
755.93	1.21872	Pd4Cl7(CH3CN)2	Pd4Cl7(CH3CN)2	0.0654066

## Sheet: CuCl_neg_Manual
Formula	theoretical m/z	experimental m/z	weight mass	intensity	comment	Error, ppm
		110.977		0.087	organics		* Relative to the most intensive signal in spectrum registered in the first (among three separate ones) ESI-MS experiment.
		123.903		0.061	organics
CuCl2	134.865	134.866	134.452	80.686		8.7636
		148.953		0.157	organics
		159.888		0.319	unidentified Cu
		173.028		0.132	organics
		175.842		0.028	unidentified Cu
		187.042		0.837	organics
		210.887		0.258	unidentified Cu
PdCl3	212.808	212.811	212.774	0.102		13.2401
		223.799		0.32	unidentified Cu
Cu2Cl3	232.763	232.764	233.451	100		3.44635
		241.793		0.037	unidentified
		259.786		0.154	unidentified Cu
		265.148		0.087	organics
		297.155		0.061	organics
CuPdCl4	312.706	312.707	311.762	0.04	low intensity	5.03673
		311.171		0.151	organics
		325.187		0.136	organics
Cu3Cl4	332.66	332.662	332.45	13.322		6.41409
		390.62		0.098	unidentified Cu
Cu2PdCl5	410.603	410.605	410.739	0.073		5.75719
Cu4Cl5	430.558	430.563	431.415	2.214		12.5952
		447.985		0.178	organics
		488.52		0.113	unidentified Cu
Cu3PdCl6	510.5	510.506	509.724	0.144		13.0673
Cu5Cl6	530.454	530.463	530.406	2.145		17.5204
		545.885		0.075	organics
		588.42		0.126	unidentified Cu
Cu4PdCl7	608.398	608.407	608.712	0.146		14.6949
Cu6Cl7	628.352	628.364	629.401	0.312		18.1708
		666.361		0.006	unidentified Cu
Cu3Pd2Cl8	688.34	688.351	687.023	0.017	low intensity	16.0083
Cu5PdCl8	708.294	708.306	707.699	0.058		16.4021
Cu7Cl8	728.249	728.26	728.383	0.108		15.5863
Cu8Cl9	826.148	826.159	827.375	0.043	low intensity	13.5768
		849.12		0.007	organics
Cu9Cl10	926.044	926.058	926.361	0.022	low intensity	14.9931
Cu10Cl11	1025.94	1025.95	1025.35	0.031	low intensity	11.7633
Cu11Cl12	1123.84	1123.85	1124.34	0.016	low intensity	12.3044

## Sheet: CuCl_pos_Manual
Formula	theoretical m/z	experimental m/z	weight mass	intensity	comment	Error, ppm
		102.127		0.936	organics		* Relative to the most intensive signal in spectrum registered in the first (among three separate ones) ESI-MS experiment.
Cu(CH3CN)	103.956	103.956	104.591	65.209		2.24949
Cu(CH3CN)(H2O)	121.967	121.965	122.605	35.586		-15.6087
Cu(CH3CN)N2	131.962	131.962	132.6	100		-0.290017
		139.123		0.933	organics
Cu(CH3CN)2	144.983	144.982	145.642	73.637		-7.32449
Cu2Cl	162.828	162.824	162.545	0.803		-22.8016
		162.902		0.314	organics
		169.132		0.133	organics
		189.009		0.171	organics
Cu2Cl(CH3CN)	203.852	203.849	203.581	4.065		-15.391
Na(C2H4O)4(H2O)	217.105	217.104	217.196	0.262	PEG	-4.19884
Cu2Cl(CH3CN)(H2O)	221.863	221.861	221.592	5.772		-9.12214
Cu2Cl(CH3CN)N2	231.859	231.858	231.59	7.66		-2.33962
		232.858		0.23	organics
Cu2Cl(CH3CN)2	244.879	244.879	244.626	18.371		-0.250249
		257.096		0.09	organics
		259.115		0.209	organics
		260.069		0.101	organics
Na(C2H4O)5(H2O)	261.131	261.128	261.243	4.267		-10.5748
		265.016		0.167	organics
		271.112		0.122	organics
		273.13		0.091	organics
		275.142		0.08	organics
		277.102		0.256	organics
		279.091		0.068	organics
		282.277		0.056	organics
		289.122		0.278	organics
		301.124		0.858	organics
Cu3Cl2(CH3CN)	301.751	301.749	302.568	1.719		-6.26321
		303.14		1.39	organics
Na(C2H4O)6(H2O)	305.158	305.153	305.296	6.473	PEG	-15.6949
		315.137		0.469	organics
		316.165		0.593	organics
		317.155		0.313	organics
		319.115		0.455	organics
Cu3Cl2(CH3CN)(H2O)	319.761	319.758	320.579	4.894		-10.3205
		321.126		0.446	organics
Cu3Cl2(CH3CN)N2	329.757	329.754	330.579	6.976		-8.15849
		330.182		0.15	organics
		332.161		0.098	organics
		333.151		0.444	organics
		342.185		1.11	organics
Cu3Cl2(CH3CN)2	342.777	342.774	343.616	7.203		-10.1737
		345.094		0.411	questionable
		345.151		0.959	organics
		345.202		2.017	organics
		347.164		0.894	organics
Na(C2H4O)7(H2O)	349.183	349.184	349.349	5.372	PEG	1.39898
		353.261		0.089	organics
		356.16		0.194	organics
		358.179		1.623	organics
		359.165		0.696	organics
		360.194		1.037	organics
		361.182		0.258	organics
		363.158		0.145	organics
K(C2H4O)7(H2O)	365.158	365.154	365.45	1.057	PEG	-10.5768
		372.154		0.281	organics
		372.229		0.221	organics
		374.17		0.872	unidentified Cu
		378.186		0.178	organics
		382.039		0.146	unidentified Cu
		388.15		0.133	organics
		389.121		0.372	organics
		389.176		0.682	organics
		390.154		0.1	organics
		391.188		1.23	organics
		392.196		0.266	organics
Na(C2H4O)8(H2O)	393.21	393.205	393.393	4.887	PEG	-11.3939
		400.263		1.968	unidentified
		403.192		0.861	organics
		407.165		0.319	organics
K(C2H4O)8(H2O)	409.184	409.178	409.497	1.113	PEG	-15.1035
		414.064		0.18	unidentified Cu
		419.166		0.185	organics
		420.72		0.116	unidentified Cu
		421.203		0.353	organics
		423.233		0.258	organics
		431.129		0.083	organics
		433.143		0.282	organics
		433.2		0.478	organics
		435.219		1.078	organics
Na(C2H4O)9(H2O)	437.237	437.231	437.44	3.084	PEG	-12.8513
		440.083		0.472	organics
		444.093		3.667	unidentified Cu
		447.22		0.832	organics
		451.192		0.385	organics
		453.205		1.003	organics
		458.073		0.494	unidentified Cu
		463.189		0.393	organics
		465.228		0.292	organics
		467.261		0.379	organics
		472.619		0.141	unidentified Pd
		474.071		0.304	unidentified Cu
		472.619		0.141	unidentified Cu
		477.228		0.303	organics
		479.062		0.194	unidentified Pd
		479.244		0.698	organics
Na(C2H4O)10(H2O)	481.262	481.258	481.486	1.807	PEG	-8.64627
		488.058		0.139	unidentified Cu
		491.244		0.645	organics
		492.244		0.15	organics
		493.203		0.183	organics
		495.215		0.28	organics
		497.231		0.524	organics
		500.155		0.9	unidentified Cu
		506.527		0.159	organics
		507.219		0.408	organics
		509.253		0.165	organics
		511.285		0.409	organics
		515.959		0.131	unidentified Cu
		521.197		0.129	organics
		521.254		0.113	organics
		523.272		0.315	organics
Na(C2H4O)11(H2O)	525.288	525.287	525.541	0.712	PEG	-1.55577
		528.07		0.136	unidentified Cu
		526.29		0.189	organics
		528.509		0.081	organics
		535.27		0.359	organics
		541.989		2.735	unidentified Cu
		551.244		0.149	organics
		553.286		0.116	organics
		554.101		0.064	organics
		555.307		0.28	organics
		555.972		0.374	unidentified Cu
		556.096		0.087	organics
		556.312		0.089	organics
		558.096		0.062	organics
		564.417		0.125	organics
		566.431		1.708	organics
		568.449		12.642	unidentified
		571.966		0.255	unidentified Cu
		578.958		0.089	unidentified Pd
		579.291		0.185	organics
		583.456		0.151	organics
		585.959		0.125	unidentified Cu
		596.479		0.166	organics
		598.055		0.67	unidentified Cu
		599.335		0.145	organics
		607.645		0.252	unidentified
		611.486		0.104	organics
		613.335		0.115	organics
		615.311		0.052	organics
		623.323		0.083	organics
		641.337		0.057	organics
		643.364		0.079	organics
		655.348		0.045	unidentified Cu
		668.345		4.007	unidentified Cu
		683.349		0.059	unidentified Cu
		703.312		0.127	unidentified Cu
		766.243		2.624	unidentified Cu
		801.206		0.075	unidentified Cu
		1012.04		0.125	unidentified Cu
		1012.04		0.125	unidentified
		1073.97		0.254	unidentified
		1175.87		0.058	unidentified Cu
		1273.76		0.078	unidentified Cu

## Sheet: PdCl2+CuCl_neg_Manual
Formula	theoretical m/z	experimental m/z	weight mass	intensity*	comment	Error, ppm
CuCl2	134.865	134.863	134.452	62.589		-13.0064	* Relative to the most intensive signal in spectrum registered in the first (among three separate ones) ESI-MS experiment.
		161.883		0.102	organics
		169.834		0.447	Pd
PdCl2	177.84	177.841	177.321	27.61		4.19294
		187.042		0.439	organics
PdCl3	212.808	212.807	212.774	82.111		-2.78041
Cu2Cl3	232.763	232.764	233.451	100		4.14039
		273.74		0.075	unidentified
PdCl2(CF3COO)	290.825	290.825	290.307	0.592		-1.36813
		301.996		0.021	unidentified
CuPdCl4	312.706	312.707	311.762	5.572		3.64497
Cu3Cl4	332.66	332.661	332.45	4.568		4.54334
		349.673		0.095	Cu and Pd
Pd2Cl5	390.649	390.652	390.057	8.484		6.73616
Cu2PdCl5	410.603	410.604	410.739	8.395		2.22793
Cu4Cl5	430.558	430.555	431.415	0.103		-4.74507
CuPd2Cl6	488.546	488.548	489.045	24.434		4.72867
Cu3PdCl6	510.5	510.504	509.724	2.166		7.86569
		529.574		0.193	Cu and Pd
Cu5Cl6	530.454	530.454	530.406	0.368		-0.0710668
Pd3Cl7	566.491	566.492	567.358	2.18		1.43122
Cu2Pd2Cl7	588.443	588.444	588.035	4.926		0.355965
		601.982		0.073	organics
Cu4PdCl7	608.398	608.396	608.712	1.462		-3.05969
CuPd3Cl8	666.387	666.392	666.349	3.72		7.98096
Cu3Pd2Cl8	688.34	688.339	687.023	1.938		-1.86891
Cu5PdCl8	708.294	708.293	707.699	0.293		-1.49854
Cu3Pd2Cl8(O2)	718.331	718.333	719.018	1.422		2.33841
Pd4Cl9	744.33	744.334	744.662	0.032		5.60999
Cu2Pd3Cl9	766.284	766.282	765.337	2.708		-1.79057
Cu4Pd2Cl9	786.237	786.241	786.012	0.347		5.7948
CuPd4Cl10	844.227	844.228	843.651	0.392		0.935495
		863.072		0.28	organics
Cu3Pd3Cl10	864.182	864.187	864.326	0.485		5.89757
Cu3Pd3Cl10(O2)	896.172	896.178	896.321	0.086		6.12936
Pd5Cl11	922.17	922.175	921.965	0.009		6.1809
Cu2Pd4Cl11	942.125	942.132	942.64	0.721		7.63417
Cu4Pd3Cl11	964.077	964.084	963.315	0.141		7.28795
		1008.01		0.017	organics
CuPd5Cl12	1020.07	1020.07	1020.95	0.117		2.56571
Cu3Pd4Cl12	1042.02	1042.03	1041.63	0.463		5.36244
		1055.87		0.047	Pd
Cu2Pd5Cl13	1119.96	1119.97	1119.94	0.34		8.31882
Cu4Pd4Cl13	1139.92	1139.93	1140.62	0.061		10.9785
CuPd6Cl14	1197.91	1197.91	1198.26	0.02		3.00143
Cu3Pd5Cl14	1217.86	1217.88	1218.93	0.096		11.8328
Cu2Pd6Cl15	1297.81	1297.82	1297.25	0.023		8.16738
Cu4Pd5Cl15	1317.76	1317.77	1317.92	0.021		10.9449
Cu3Pd6Cl16	1395.7	1395.72	1396.23	0.111		10.3411

## Sheet: PdCl2+CuCl_pos_Manual
Formula	theoretical m/z	experimental m/z	weight mass	intensity	comment	Error, ppm
Cu(CH3CN)	103.956	103.956	104.591	36.907		1.99128	* Relative to the most intensive signal in spectrum registered in the first (among three separate ones) ESI-MS experiment.
Cu(CH3CN)(H2O)	121.967	121.968	122.605	20.394		8.37763
Cu(CH3CN)N2	131.962	131.962	132.6	59.802		-0.548219
		139.123		0.365	organics
Cu(CH3CN)2	144.983	144.982	145.642	100		-7.58269
		148.928		0.759	unidentified Cu
		157.083		0.215	organics
Cu2Cl	162.828	162.824	162.545	0.214		-23.0598
		162.902		0.721	unidentified Cu2
		186.007		0.083	organics
Pd(CH3CN)2	187.957	187.956	188.505	1.779		-4.42406
		194.116		0.153	organics
Cu2Cl(CH3CN)	203.852	203.853	203.581	1.148		3.73826
		203.928		0.386	unidentified Cu
		215.09		0.095	organics
Na(C2H4O)4(H2O)	217.105	217.104	217.196	1.516	PEG	-4.45704
Cu2Cl(CH3CN)(H2O)	221.863	221.861	221.592	1.426		-9.38034
PdCl(CH3CN)2	224.925	224.923	223.952	1.468		-9.86411
Cu2Cl(CH3CN)N2	231.859	231.858	231.59	2.295		-2.59783
Cu2Cl(CH3CN)2	244.879	244.879	244.626	8.668		-0.508452
		259.115		0.977	organics
Na(C2H4O)5(H2O)	261.131	261.128	261.243	5.31	PEG	-10.833
		263.136		0.104	organics
		275.11		0.228	organics
CuPdCl2(CH3CN)	281.796	281.794	281.891	2.819		-8.35371
		282.882		0.193	unidentified Cu
		289.127		0.402	organics
		297.805		0.258	unidentified Cu
		301.124		1.064
		303.14		1.478	organics
Na(C2H4O)6(H2O)	305.158	305.158	305.296	4.324	PEG	-0.107237
		309.798		0.251	unidentified Pd
		318.24		0.268	organics
		319.758		0.248	unidentified Cu
CuPdCl2(CH3CN)2	322.823	322.824	322.94	10.267		4.75115
		329.754		0.412	unidentified Cu
		333.151		0.365	organics
		336.25		0.052	unidentified
		340.665		0.087
CuPdCl2(CH3CN)2(H2O)	340.833	340.834	340.953	0.985		2.18371
Cu3Cl2(CH3CN)2	342.777	342.779	343.616	0.834		4.51926
		344.2		0.768	unidentified
		344.775		0.67	unidentified
		345.15		0.586	unidentified
Na(C2H4O)7(H2O)	349.183	349.184	349.349	3.655	PEG	1.14078
		350.825		0.279	unidentified
		353.266		1.444	unidentified
		358.179		0.505	unidentified
		363.849		0.32	unidentified Pd
		381.298		0.887	unidentified Cu
Cu2PdCl3(CH3CN)	381.693	381.693	380.88	3.044		-1.39249
Na(C2H4O)8(H2O)	393.21	393.211	393.393	3.094	PEG	2.30731
Pd2Cl3(CH3CN)2	402.766	402.765	401.253	0.923		-2.23455
		403.192		0.399	organics
		421.203		0.263	organics
Cu2PdCl3(CH3CN)2	422.72	422.721	421.928	2.505		3.00937
Na(C2H4O)9(H2O)	437.237	437.237	437.44	2.055	PEG	0.128478
		443.79		0.566	unidentified Pd
		447.22		0.452	organics
		451.215		0.128	unidentified Cu Pd
CuPd2Cl4(CH3CN)	459.637	459.633	459.194	0.187		-8.02866
		465.228		0.221	organics
		467.26		0.234	organics
		477.591		0.179	organics
Cu3PdCl4(CH3CN)	479.591	479.589	479.869	0.245		-3.92325
Na(C2H4O)10(H2O)	481.262	481.258	481.486	1.199	PEG	-8.90447
		486.067		0.649	unidefined Cu Pd
		491.243		0.35	organics
CuPd2Cl4(CH3CN)2	500.663	500.663	500.242	3.163		-0.486162
Cu3PdCl4(CH3CN)2	520.618	520.616	520.917	0.503	PEG	-4.34915
Na(C2H4O)11(H2O)	525.288	525.287	525.541	0.674	PEG	-1.81398
		528.509		0.163	organics
		535.269		0.201	organics
Cu2Pd2Cl5(CH3CN)	559.533	559.528	558.183	0.281		-8.49776
		566.438		0.517	organics
		568.449		3.427	unidentified
Na(C2H4O)12(H2O)	569.316	569.314	569.589	0.324	PEG	-2.97715
		583.462		0.283	unidentified
		587.541		0.26	unidentified Cu Pd
Cu2Pd2Cl5(CH3CN)2	598.561	598.556	599.231	1.662		-8.78446
CuPd3Cl6(CH3CN)	637.476	637.473	636.497	0.106		-5.16393
		646.394		0.105	unidentified Pd
Cu3Pd2Cl6(CH3CN)	657.431	657.433	657.172	0.161		3.38925
		668.352		0.268	unidentified Cu
CuPd3Cl6(CH3CN)2	678.504	678.502	677.545	0.523		-3.44261
Cu3Pd2Cl6(CH3CN)2	698.458	698.453	698.22	0.557		-6.95633
		710.31		0.357	unidentified Cu Pd
Cu2Pd3Cl7(CH3CN)	735.376	735.375	735.486	0.338		-1.26502
Cu4Pd2Cl7(CH3CN)	757.328	757.327	756.161	0.128		-0.45179
Cu2Pd3Cl7(CH3CN)2	776.401	776.399	776.534	0.687		-3.06358
		787.32		0.898	unidentified Cu Pd
Cu4Pd2Cl7(CH3CN)2	798.354	798.356	797.209	0.038		2.58282
Cu3Pd3Cl8(CH3CN)	835.271	835.268	834.475	0.073		-3.91331
		837.189		0.095	unidentified
CuPd4Cl8(CH3CN)2	854.344	854.344	854.848	0.099		-0.487995
Cu3Pd3Cl8(CH3CN)2	876.297	876.296	875.523	0.15		-0.912805
		887.22		0.283	unidentified Cu Pd
Cu2Pd4Cl9(CH3CN)	913.216	913.215	912.789	0.167		-0.890359
Cu4Pd3Cl9(CH3CN)	933.168	933.164	933.464	0.036		-4.4895
Cu2Pd4Cl9(CH3CN)2	954.241	954.244	953.837	0.274		3.68433
Cu4Pd3Cl9(CH3CN)2		969.172		0.036	unidentified Cu Pd	#DIV/0!
Cu3Pd4Cl10(CH3CN)	1011.11	1011.11	1011.78	0.135		-2.95642
Cu3Pd4Cl10(CH3CN)2	1052.14	1052.14	1052.83	0.093		0.195726
		1065.06		0.07	unidentified Cu Pd
		1124.08		0.046	unidentified Cu Pd
		1129.08		0.094	unidentified Cu

[truncated: 2 more sheets: PdCl2_neg_Manual, PdCl2_pos_Manual]
